# Supplementary material for: IGFBP7 as a preoperative predictor of congestive acute kidney injury after cardiac surgery
Source: HighWire-hosted journal article supplement (doi:10.1136/openhrt-2022-002027), 2022-06-01
Supplement: openhrt-2022-002027supp001_data_supplement.pdf [file openhrt-2022-002027supp001_data_supplement.pdf]

**Table S1.** Auxiliary variables retained in the adjusted models.

| Outcome | IGFBP7                      | NT-proBNP                   | PAPi                |
|---------|-----------------------------|-----------------------------|---------------------|
| c-AKI   | Mitral or tricuspid surgery | Mitral or tricuspid surgery | Preoperative LVEF   |
|         | Preoperative LVEF           | Preoperative LVEF           |                     |
|         |                             | Post-induction CVP          |                     |
| AKI     | Mitral or tricuspid surgery | Mitral or tricuspid surgery | Diabetes            |
|         | Diabetes                    | Diabetes                    |                     |
|         |                             | Post-induction CVP          |                     |
| RVF     | Diabetes                    | Diabetes                    | Baseline creatinine |
|         |                             | Preoperative RV dysfunction |                     |
|         |                             | Baseline creatinine         |                     |

Abbreviations: IGFBP7 = insulin like growth factor binding protein 7, NT-proBNP = N-terminal pro hormone B-type natriuretic peptide, PAPi = pulmonary artery pulsatility index, c-AKI = congestive acute kidney injury, AKI = acute kidney injury, RVF = right ventricular failure, CVP = central venous pressure, RV = right ventricle, LVEF = left ventricular ejection fraction
